# Supplementary material
Source: ML conference proceedings conference paper supplement (https://proceedings.mlr.press/v139/zhong21a.html)
Supplement: Supplementary file 2 [file zhong21a-supp.zip]

## A. Notations

|                                                                        |                                                                                                             |
|------------------------------------------------------------------------|-------------------------------------------------------------------------------------------------------------|
| $[n]$                                                                  | set $\{1, \dots, n\}$ for any $n \in \mathbb{N}$                                                            |
| $[L]$                                                                  | ground set of size $L$                                                                                      |
| $\nu(i)$                                                               | reward distribution of item $i \in [L]$                                                                     |
| $w(i)$                                                                 | mean reward of item $i \in [L]$                                                                             |
| $W_t(i)$                                                               | random reward of item $i$ at time step $t$                                                                  |
| $c_t(i)$                                                               | corruption added on random reward item $i$ at time step $t$                                                 |
| $\tilde{W}_t(i)$                                                       | corrupted reward of item $i$ at time step $t$                                                               |
| $i_t$                                                                  | pulled item at time step $t$                                                                                |
| $C$                                                                    | total corruption budget                                                                                     |
| $\mathbb{P}$                                                           | probability law of the process $\{\tilde{\mathbf{W}}_t = (\tilde{W}_t(1), \dots, \tilde{W}_t(L))\}_{t=1}^T$ |
| $\Delta_{1,i}$                                                         | gap between mean rewards of item 1 and $i$                                                                  |
| $\epsilon$                                                             | optimality gap of item                                                                                      |
| $\pi$                                                                  | non-anticipatory algorithm                                                                                  |
| $i_t^\pi$                                                              | pulled item of algorithm $\pi$ at time step $t$                                                             |
| $i_{\text{out}}^{\pi,T}$                                               | output of algorithm $\pi$                                                                                   |
| $\phi^{\pi,T}$                                                         | final recommendation rule of algorithm $\pi$                                                                |
| $\mathcal{F}_t$                                                        | observation history                                                                                         |
| $\epsilon_C$                                                           | bound on $\Delta_{1,i_{\text{out}}^{\pi,T}}$                                                                |
| $\delta$                                                               | failure probability                                                                                         |
| $u$                                                                    | parameter in Algorithm 1                                                                                    |
| $M$                                                                    | amount of phases in Algorithm 1                                                                             |
| $N$                                                                    | length of one phase in Algorithm 1                                                                          |
| $A_m$                                                                  | active set in Algorithm 1                                                                                   |
| $q_m$                                                                  | probability to pull an active item during phase $m$ in Algorithm 1                                          |
| $n_m$                                                                  | expected number of pulls of an active item during phase $m$ in Algorithm 1                                  |
| $\hat{w}_m(i)$                                                         | corrupted empirical mean of item $i$ during phase $m$ in Algorithm 1                                        |
| $\tilde{H}_2(w, L, u)$                                                 | difficulty of the instance $\{w(i)\}_{i=1}^L$ for PSS( $u$ )                                                |
| $H_2(w)$                                                               | intrinsic difficulty of the instance $\{w(i)\}_{i=1}^L$                                                     |
| $\text{Bern}(a)$                                                       | Bernoulli distribution with parameter $a \in [0, 1]$                                                        |
| $L_\epsilon$                                                           | number of item $i$ with $\Delta_{1,i} \leq \epsilon$                                                        |
| $\Delta$                                                               | equals to $\Delta_{1,2}$                                                                                    |
| $\lambda$                                                              | parameter in the analysis of corruption strategies                                                          |
| $C_m$                                                                  | amount of corruptions during phase $m$                                                                      |
| $\mathcal{E}_{m,i}^{(\text{U})}(a), \mathcal{E}_{m,i}^{(\text{L})}(a)$ | “nice events” in the analysis of Algorithm 1                                                                |
| $m_1$                                                                  | index of the phase during which item 1 turns from active to inactive                                        |
| $j_1$                                                                  | item in $A_{m_1}$ with the least mean reward                                                                |

$a_i$  equals to  $\Delta_{1,i}/8$  for all items  $2 \leq i \leq L$

## B. Useful theorems

**Theorem B.1** (Standard multiplicative variant of the Chernoff-Hoeffding bound; [Dubhashi & Panconesi \(2009\)](#), Theorem 1.1). *Suppose that  $X_1, \dots, X_T$  are independent  $[0, 1]$ -valued random variables, and let  $X = \sum_{t=1}^T X_t$ . Then for any  $\epsilon > 0$ ,*

$$\Pr[X - \mathbb{E}X \geq \epsilon \mathbb{E}X] \leq \exp\left(-\frac{\epsilon^2}{3} \mathbb{E}X\right), \quad \Pr[X - \mathbb{E}X \leq -\epsilon \mathbb{E}X] \leq \exp\left(-\frac{\epsilon^2}{3} \mathbb{E}X\right).$$

**Theorem B.2** ([Beygelzimer et al. \(2011\)](#), Theorem 1; [Gupta et al. \(2019\)](#), Theorem 10). *Suppose that  $X_1, \dots, X_T$  is a martingale difference sequence with respect to a filtration  $\{\mathcal{F}_t\}_{t=1}^T$ , and let  $X = \sum_{t=1}^T X_t$ . Assume that  $|X_t| \leq b$  for all  $t$ , and define  $V = \sum_{t=1}^T \mathbb{E}[X_t^2 | \mathcal{F}_{t-1}]$ . Then for any  $\delta > 0$ ,*

$$\Pr\left[X \leq \frac{V}{b} + b \ln \frac{1}{\delta}\right] \geq 1 - \delta.$$

**Theorem B.3** (Multiplicative Chernoff Bound ([Mitzenmacher & Upfal, 2017](#); [Chen et al., 2016](#))). *Let  $X_1, \dots, X_n$  be Bernoulli random variables taking values in  $\{0, 1\}$  such that  $\mathbb{E}[X_t | X_1, \dots, X_{t-1}] \geq \mu$  for all  $t \leq n$ , and  $Y = X_1 + \dots + X_n$ . Then, for all  $\delta \in (0, 1)$*

$$\Pr[Y \leq (1 - \delta)n\mu] \leq e^{-\frac{\delta^2 n\mu}{2}}.$$

## C. Proofs of main results

In this section, we provide proofs of Lemmas 5.1 – 5.3, complete the proof of Theorem 4.1, and provide the proofs of Theorem 4.2 – 4.4.

### C.1. Proof of Lemma 5.1

**Lemma 5.1.** *It holds that  $NM \leq T$  and  $|A_M| = 1$ .*

*Proof.* (i)  $NM = \lfloor T/M \rfloor \cdot M \leq T/m \cdot M = T$ .

(ii) Since  $M = \lceil \log_u L \rceil$ ,  $|A_M| = \lceil L/u^M \rceil$ , we have

$$L \leq u^M \Rightarrow |A_M| \leq \left\lceil \frac{u^M}{u^M} \right\rceil = 1, \quad \frac{L}{u^{M-1}} > 0 \Rightarrow |A_M| \geq 1.$$

□

### C.2. Proof of Lemma 5.2

**Lemma 5.2.** *Let  $\bar{\mathcal{E}}$  denote the complement of any event  $\mathcal{E}$ . For any fixed  $m, i \in A_{m-1}$  and  $a \in (0, 1)$ ,*

$$\mathbb{P}[\overline{\mathcal{E}_{m,i}^{(U)}}(a)] \leq 2 \exp\left[-\frac{a^2 n_m}{3}\right], \quad \mathbb{P}[\overline{\mathcal{E}_{m,i}^{(L)}}(a)] \leq 2 \exp\left[-\frac{a^2 n_m}{3}\right].$$

*Proof.* (i) Let  $Y_t(i)$  be an indicator for item  $i$  being pulled at time step  $t$  and  $\tilde{n}_m(i)$  be the number of pulls of item  $i$  during phase  $m$ . Recall that  $W_t(i)$  is the stochastic reward of item  $i$  at time step  $t$  and  $c_t(i) = \tilde{W}_t(i) - W_t(i)$  is the corruption added to this item by the adversary at this time step. Note that  $c_t(i)$  may depend on all the stochastic rewards up to (and including) time step  $t$ , and also on all previous choices of the algorithm (though not the choice at step  $t$ ). We denote  $E_m := [T_{m-1} + 1, \dots, T_m]$  as the  $N$  many time steps in phase  $m$ . Then

$$\hat{w}_m(i) = \frac{1}{n_m} \sum_{t \in E_m} Y_t(i)[W_t(i) + c_t(i)].$$

For ease of analysis, let us break the sum above into two, and define

$$A_m(i) = \sum_{t \in E_m} Y_t(i)W_t(i) \quad \text{and} \quad B_m(i) = \sum_{t \in E_m} Y_t(i)c_t(i).$$

(ii) Let us first bound the deviation of  $A_m(i)$ . Observe that  $W_t(i)$  is an independent draw from a  $[0, 1]$ -valued r.v. with mean  $w(i)$  and  $Y_t(i)$  is an independent random variable drawn from  $\{0, 1\}$  with mean  $q_m$ . Moreover, we have that  $\mathbb{E}[A_m(i)] = N \cdot [q_m w(i)] = n_m w(i) \leq n_m$ . Hence, for any  $a_{1,m,i} > 0$ , a Chernoff-Hoeffding bound (a multiplicative version thereof) as in Theorem B.1 implies that

$$\mathbb{P}\left[\frac{A_m(i)}{n_m} - w(i) \geq a_{1,m,i}\right] \leq \exp\left[-\frac{a_{1,m,i}^2 \cdot n_m}{3}\right], \quad \mathbb{P}\left[\frac{A_m(i)}{n_m} - w(i) \leq -a_{1,m,i}\right] \leq \exp\left[-\frac{a_{1,m,i}^2 \cdot n_m}{3}\right].$$

(iii) Next, we turn to bound the deviation of  $B_m(i)$ . Consider the sequence of r.v.s  $X_1, \dots, X_T$  defined by  $X_t = [Y_t(i) - q_m] \cdot c_t(i)$  for all  $t$ . Then  $\{X_t\}_{t=1}^T$  is a martingale difference sequence with respect to the filtration  $\{\tilde{\mathcal{F}}_t\}_{t=1}^T$ , where

$$\tilde{\mathcal{F}}_t = \sigma(\{Y_s(i)\}_{s \leq t, i \in [L]}, \{W_s(i)\}_{s \leq t+1, i \in [L]}, \{c_s(i)\}_{s \leq t+1, i \in [L]}).$$

According to the problem setup, the adversary obtains more information than the agent, which results in the difference between  $\mathcal{F}_t$  defined in Section 2 and  $\tilde{\mathcal{F}}_t$  here. Since the corruption  $c_t(i)$  becomes a deterministic value when conditioned on  $\tilde{\mathcal{F}}_{t-1}$  (as we assume a deterministic adversary), and since  $\mathbb{E}[Y_t(i)|\tilde{\mathcal{F}}_{t-1}] = q_m$ , we have

$$\mathbb{E}[X_t|\tilde{\mathcal{F}}_{t-1}] = \mathbb{E}[Y_t(i) - q_m|\tilde{\mathcal{F}}_{t-1}] \cdot c_t(i) = 0.$$

Further, we have  $|X_t|, |c_t(i)| \leq 1$  for all  $t$ , and we can bound the predictable quadratic variation of this martingale as

$$\begin{aligned} V &= \sum_{t \in E_m} \mathbb{E}[X_t^2|\tilde{\mathcal{F}}_{t-1}] = \sum_{t \in E_m} \mathbb{E}[(Y_t(i) - q_m)^2|\tilde{\mathcal{F}}_{t-1}] \cdot c_t(i)^2 \leq \sum_{t \in E_m} |c_t(i)| \cdot \mathbb{E}[(Y_t(i) - q_m)^2|\tilde{\mathcal{F}}_{t-1}] \\ &= \sum_{t \in E_m} |c_t(i)| \cdot \text{Var}[Y_t(i)] = \sum_{t \in E_m} |c_t(i)| \cdot q_m \cdot (1 - q_m) \leq q_m \cdot \sum_{t \in E_m} |c_t(i)|. \end{aligned}$$

Applying a Freedman-type concentration inequality for martingales (Theorem B.2), we obtain that except with probability  $\delta_{2,m,i}$  (setting  $b = 1$  in Theorem B.2),

$$\frac{B_m(i)}{n_m} \leq \frac{q_m}{n_m} \cdot \sum_{t \in E_m} |c_t(i)| + \frac{V + \log(1/\delta_{2,m,i})}{n_m} \leq \frac{2q_m}{n_m} \cdot \sum_{t \in E_m} |c_t(i)| + \frac{\log(1/\delta_{2,m,i})}{n_m}.$$

Since  $q_m = n_m/N$ , We have

$$\mathbb{P}\left[\frac{B_m(i)}{n_m} \geq \frac{2 \sum_{t \in E_m} |C_t(i)|}{N} + \frac{\log(1/\delta_{2,m,i})}{n_m}\right] \leq \delta_{2,m,i}.$$

Similar arguments show that  $-B_m(i)/n_m$  satisfies this bound with probability  $\delta_{2,m,i}$ .

(iv) Let

$$a_{2,m,i} = \frac{\log(1/\delta_{2,m,i})}{n_m}.$$

Altogether, we have

$$\begin{aligned} \mathbb{P}\left[\hat{w}_m(i) \geq w(i) + \frac{2 \sum_{t \in E_m} |C_t(i)|}{N} + a_{1,m,i} + a_{2,m,i}\right] &\leq \exp\left[-\frac{a_{1,m,i}^2 \cdot n_m}{3}\right] + \exp[-a_{2,m,i} \cdot n_m], \\ \mathbb{P}\left[\hat{w}_m(i) \leq w(i) - \frac{2 \sum_{t \in E_m} |C_t(i)|}{N} - a_{1,m,i} - a_{2,m,i}\right] &\leq \exp\left[-\frac{a_{1,m,i}^2 \cdot n_m}{3}\right] + \exp[-a_{2,m,i} \cdot n_m]. \end{aligned}$$

Note that  $\sum_{t \in E_m} |c_t(i)| \leq C_m$ . For  $a_{1,m,i} = a_{2,m,i} = a \in (0, 1)$ , we have

$$\begin{aligned} \mathbb{P} \left[ \hat{w}_m(i) \geq w(i) + \frac{2C_m}{N} + 2a \right] &\leq 2 \exp \left[ -\frac{a^2 \cdot n_m}{3} \right], \\ \mathbb{P} \left[ \hat{w}_m(i) \leq w(i) - \frac{2C_m}{N} - 2a \right] &\leq 2 \exp \left[ -\frac{a^2 \cdot n_m}{3} \right]. \end{aligned}$$

□

### C.3. Proof of Lemma 5.3

**Lemma 5.3.** *Conditioned on  $\mathcal{E}_{m,1}^{(L)}(a_i)$  and  $\mathcal{E}_{m,i}^{(U)}(a_i)$ , where  $a_i = \Delta_{1,i}/8$  for each  $2 \leq i \leq L$ , we have*

$$\{1 \in A_{m-1}, 1 \notin A_m, i \in A_m\} \subset \left\{ \Delta_{1,i} \leq \frac{8C_m}{N} \right\}.$$

*Proof.* First of all,

$$\begin{aligned} \{1 \in A_{m-1}, 1 \notin A_m, i \in A_m\} &\subset \{1, i \in A_{m-1}, i \in A_m, \hat{w}_m(1) \leq \hat{w}_m(j) \ \forall j \in A_m\} \\ &\subset \{1, i \in A_{m-1}, \hat{w}_m(1) \leq \hat{w}_m(i)\}. \end{aligned}$$

Assume  $\mathcal{E}_{m,1}^{(L)}(a_i)$  and  $\mathcal{E}_{m,i}^{(U)}(a_i)$  hold. We have

$$w(1) - \frac{2C_m}{N} - 2a_i < \hat{w}_m(1) \leq \hat{w}_m(i) < w(i) + \frac{2C_m}{N} + 2a_i.$$

In other words,

$$w(1) - w(i) < \frac{4C_m}{N} + 4a_i.$$

Note that  $a_i = \Delta_{1,i}/8$ , we have

$$\Delta_{1,i} < \frac{4C_m}{N} + \frac{\Delta_{1,i}}{2} \Rightarrow \Delta_{1,i} < \frac{8C_m}{N}$$

as desired.

□

### C.4. Final steps to prove Theorem 4.1

(i) Assume  $\mathcal{E}_{m_1,1}^{(L)}(a_{j_1})$  and  $\mathcal{E}_{m_1,j_1}^{(U)}(a_{j_1})$  hold.

**Case 1:**  $1 \neq i_{\text{out}}$ . Lemma 5.3 implies that for any realization of  $j_1, m_1$ ,

$$\Delta_{1,j_1} \leq \frac{8C_{m_1}}{N}.$$

Since  $i_{\text{out}} \in A_m$  for all  $1 \leq m \leq M$ , we have  $i_{\text{out}} \in A_{m_1}$ . In addition, since

$$j_1 := \arg \min_{i \in A_{m_1}} w(i),$$

we have  $\Delta_{1,i_{\text{out}}} \leq \Delta_{1,j_1}$ . Therefore,

$$\Delta_{1,i_{\text{out}}} \leq \Delta_{1,j_1} \leq \frac{8C_{m_1}}{N} \leq \frac{8C}{N}.$$

**Case 2:**  $1 = i_{\text{out}}$ . It is trivial to see  $\Delta_{1,i_{\text{out}}} \leq 8C/N$ .

Hence, when  $\mathcal{E}_{m_1,1}^{(L)}(a_{j_1})$  and  $\mathcal{E}_{m_1,j_1}^{(U)}(a_{j_1})$  hold, we always have  $\Delta_{1,i_{\text{out}}} \leq 8C/N$ .

(ii) Altogether, for any realization of  $m_1, j_1$ ,

$$\mathbb{P}\left[\left\{\Delta_{1,i_{\text{out}}} > \frac{8C}{N}\right\} \cap \{m_1 = m, j_1 = i\}\right] \leq \mathbb{P}\left[\left(\overline{\mathcal{E}_{m_1,1}^{(L)}(a_{j_1})} \cap \overline{\mathcal{E}_{m_1,j_1}^{(U)}(a_{j_1})}\right) \cap \{m_1 = m, j_1 = i\}\right]. \quad (\text{C.1})$$

In addition, we have

$$\begin{aligned} & \mathbb{P}\left[\left(\overline{\mathcal{E}_{m_1,1}^{(L)}(a_{j_1})} \cap \overline{\mathcal{E}_{m_1,j_1}^{(U)}(a_{j_1})}\right) \cap \{m_1 = m, j_1 = i\}\right] \\ & \leq \mathbb{P}\left[\overline{\mathcal{E}_{m_1,1}^{(L)}(a_{j_1})} \cap \{m_1 = m, j_1 = i\}\right] + \mathbb{P}\left[\overline{\mathcal{E}_{m_1,j_1}^{(U)}(a_{j_1})} \cap \{m_1 = m, j_1 = i\}\right] \\ & \leq \mathbb{P}\left[\overline{\mathcal{E}_{m_1,1}^{(L)}(a_{j_1})} \cap \{u \cdot i \geq |A_{m-1}|\}\right] + \mathbb{P}\left[\overline{\mathcal{E}_{m_1,j_1}^{(U)}(a_{j_1})} \cap \{u \cdot i \geq |A_{m-1}|\}\right] \end{aligned} \quad (\text{C.2})$$

$$\leq 4 \exp\left[-\frac{a_i^2 \cdot n_m}{3}\right] \cdot \mathbb{I}\{u \cdot i \geq |A_{m-1}|\} \quad (\text{C.3})$$

$$= 4 \exp\left[-\frac{\Delta_{1,i}^2 \cdot N}{192|A_{m-1}|}\right] \cdot \mathbb{I}\{u \cdot i \geq |A_{m-1}|\} \quad (\text{C.4})$$

$$\leq 4 \exp\left[-\frac{\Delta_{1,i}^2 \cdot N}{192 \cdot \min\{u \cdot i, L\}}\right] \quad (\text{C.5})$$

$$\leq 4 \exp\left[-\frac{N}{192\tilde{H}_2(w, L, u)}\right]. \quad (\text{C.6})$$

Line (C.2) results from the definitions of  $j_1, A_m$  ( $1 \leq m \leq M$ ), which implying that

$$j_1 \geq |A_{m_1}| = \left\lceil \frac{L}{u^{m_1}} \right\rceil = \left\lceil \frac{L}{u \cdot u^{m_1-1}} \right\rceil \geq \frac{\lceil \frac{L}{u^{m_1-1}} \rceil}{u} = \frac{|A_{m_1-1}|}{u}.$$

Line (C.3) follows from Lemma 5.2. Line (C.4) applies the definitions of  $a_i$  and  $n_m$  for all  $i, v, m$ :

$$a_i = \frac{\Delta_{1,i}}{8} \quad \forall 2 \leq i \leq L, \quad \text{and} \quad n_m = \frac{N}{|A_{m-1}|} \quad \forall 1 \leq m \leq M.$$

Lines (C.5) and (C.6) result from the fact that  $|A_m| \leq L$  for all  $m$  and the definition of  $\tilde{H}_2(w, L, u)$  in (4.2), i.e.,

$$\tilde{H}_2(w, L, u) = \max_{i \neq 1} \frac{\min\{u \cdot i, L\}}{\Delta_{1,i}^2}.$$

(iii) Combining (C.1) and (C.6), we have

$$\mathbb{P}\left[\Delta_{1,i_{\text{out}}} > \frac{8C}{N}\right] \leq \sum_{m=1}^M \sum_{i=2}^L \mathbb{P}\left[\left\{\Delta_{1,i_{\text{out}}} > \frac{8C}{N}\right\} \cap \{m_1 = m, j_1 = i\}\right] \leq 4M(L-1) \exp\left[-\frac{N}{192\tilde{H}_2(w, L, u)}\right].$$

We complete the proof of Theorem 4.1 with  $N = \lfloor T/M \rfloor$ ,  $M = \lceil \log_u L \rceil$ .

### C.5. Proof of Theorem 4.2

**Theorem 4.2.** Fix  $\lambda \in (0, 1)$  and  $\Delta \in (0, 1/2)$ . For any online algorithm, there is a BAI with an adversarial corruption instance in  $T$  steps, corruption budget  $C = 1 + (1 + \lambda)2\Delta T$ , and optimality gap  $\Delta$ , such that

$$\begin{aligned} \mathbb{P}[\Delta_{1,i_{\text{out}}} > 0] &= \mathbb{P}[\Delta_{1,i_{\text{out}}} \geq \Delta] = \mathbb{P}[i_{\text{out}} \neq 1] \\ &\geq \frac{1}{2} \cdot \left[1 - \exp\left(-\frac{2\lambda^2 \Delta T}{3}\right)\right]. \end{aligned}$$

*Proof.* We fix  $w = \{w(i)\}_{i \in [L]}$ , where  $1 > w(1) > w(2) > w(3) \geq \dots \geq w(L) > 0$ , and we define  $\Delta = w(1) - w(2)$ . We assume  $w(2) - \Delta > w(3) > 0$ . We prove the Theorem by a coupling argument between two Bernoulli instances  $\mathcal{I}, \mathcal{I}'$ , both on the ground set  $[L]$ . Both involve  $T$  time steps and corruption budget  $C = (1 + \lambda)2\Delta T$ .

In instance  $\mathcal{I}$ , the uncorrupted reward distribution of item  $i$  is  $\text{Bern}(w(i))$ , and the adversary corrupts the rewards of item 1 probabilistically, as detailed in the forthcoming coupling in Algorithm 2. In instance  $\mathcal{I}'$  the uncorrupted reward distribution of the items are:

- $\text{Bern}(u(1))$ , where  $u(1) = w(2) - \Delta$ , for item 1,
- $\text{Bern}(u(i))$ , where  $u(i) = w(i)$ , for item  $i \in [L] \setminus \{1\}$ ,

but the adversary does not corrupt any of the rewards on instance  $\mathcal{I}'$ . The optimal items in instances  $\mathcal{I}, \mathcal{I}'$  are different, and they are item 1, item 2 respectively. Both instances have optimality gap  $\Delta$ , since in instance  $\mathcal{I}'$  we have  $u(2) > u(1) > u(3) \geq \dots \geq u(L) > 0$ .

We denote the original and corrupted rewards of item  $i$  at time step  $t$  in instance  $\mathcal{I}$  as  $W_t(i), \tilde{W}_t(i)$  respectively, and the original and corrupted rewards of item  $i$  at time step  $t$  in instance  $\mathcal{I}'$  as  $U_t(i), \tilde{U}_t(i)$  respectively. Since there is no corruption on  $\mathcal{I}'$ , we have  $U_t(i) = \tilde{U}_t(i)$  for all  $t, i$  always.

Fix a BAI algorithm  $\pi$ , and considering running  $\pi$  on the instances  $\mathcal{I}, \mathcal{I}'$ . When  $\pi$  is randomized, we assume that  $\pi$  has the same random seed in the two runs, so that  $\pi$  recommends the same item in both instances  $\mathcal{I}, \mathcal{I}'$  if  $\tilde{W}_t(i) = \tilde{U}_t(i)$  for all  $t, i$ . Now, we couple the instances as shown  $\mathcal{I}, \mathcal{I}'$  in Algorithm 2.

---

**Algorithm 2** Coupling on instances  $\mathcal{I}, \mathcal{I}'$ 


---

```

1: Set remaining corruption budget  $B \leftarrow C$ .
2: for time step  $t = 1, \dots, T$  do
3:   Adversary observes  $\{W_t(i)\}_{i \in [L]}$ , where  $W_t(i) \sim \text{Bern}(w(i))$ .
4:   Adversary generates  $G_t \sim \text{Bern}(2\Delta/w(1))$ , independent of  $W_t$ .
5:   if  $B \geq 1$  then
6:     if  $W_t(1) = 0$  then
7:       Set  $\tilde{W}_t(1) \leftarrow 0$ .
8:     else if  $W_t(1) = 1, G_t = 1$  then
9:       Set  $\tilde{W}_t(1) \leftarrow 0$  ( $c_t(1) = -1$ ).
10:    Update  $B \leftarrow B - 1$ .
11:   else if  $W_t(1) = 1, G_t = 0$  then
12:     Set  $\tilde{W}_t(1) \leftarrow 1$ .
13:   end if
14:   Set  $\tilde{W}_t(i) \leftarrow W_t(i)$  for all  $i \in [L] \setminus \{1\}$ .
15:   Set  $U_t(i) \leftarrow \tilde{W}_t(i), \tilde{U}_t(i) \leftarrow \tilde{W}_t(i)$  for all  $i \in [L]$ .
16:   else
17:     Set  $\tilde{W}_t(i) \leftarrow W_t(i)$  for all  $i \in [L]$  ( $c_t(i) = 0$ ).
18:     Set  $U_t(i) \leftarrow \tilde{W}_t(i), \tilde{U}_t(i) \leftarrow \tilde{W}_t(i)$  for all  $i \in [L] \setminus \{1\}$ .
19:     Sample  $U_t(1) = \tilde{U}_t(1) \sim \text{Bern}((w(2) - \Delta))$  (recall  $u(1) = w(2) - \Delta$ ).
20:   end if
21: end for
    
```

---

We make two crucial observation on the coupling in Algorithm 2:

1. If the corruption budget  $C$  is sufficient, that is if we have  $B \geq 1$  at the start of time step  $T$ , then  $\tilde{W}_t(i) = \tilde{U}_t(i)$  for all  $i, t$ , so that the algorithm  $\pi$  recommends the same item in both instances.
2. The coupling is valid, in the sense that:
  - (a) The corruption budget is never exceeded,
  - (b) We always have  $W_t(i) \sim \text{Bern}(w(i))$ ,
  - (c) We always have  $\tilde{U}_t(i) = U_t(i) \sim \text{Bern}(u(i))$ .

The claims (a, b) are clearly true, and for claim (c), we need to verify that  $\tilde{U}_t(1) = U_t(1) \sim \text{Bern}(u(1))$ . Indeed, at a time step  $t$ :

- If  $B < 1$ , then Line 19 imposes that  $U_t(1) \sim \text{Bern}(u(1))$ .
- If  $B \geq 1$ , then by the **if** loop in Line 5, we have

$$\begin{aligned} & \mathbb{P}[U_t(1) = \tilde{U}_t(1) = 1 | B \geq 1 \text{ at the start of time step } t] \\ &= \mathbb{P}[W_t(1) = 1, G_t = 0] = \mathbb{P}[W_t(1) = 1] \cdot \mathbb{P}[G_t = 0] \\ &= w(1) \cdot \left(1 - \frac{2\Delta}{w(1)}\right) = w(1) - 2\Delta = w(2) - \Delta = u(1). \end{aligned}$$

The key to the proof is that the optimal item in instances  $\mathcal{I}, \mathcal{I}'$  are 1, 2 respectively which are different item. By observation 1, if  $B \geq 1$  at the start of time  $T$ , then the algorithm  $\pi$  cannot identify the optimal item in both instances. Denote events  $\mathcal{A}_1 = \{\pi \text{ outputs item 1 in } \mathcal{I}\}$  and  $\mathcal{A}_2 = \{\pi \text{ outputs item 2 in } \mathcal{I}'\}$ , and denote  $\mathbb{P}$  as the probability measure under the coupling in Algorithm 2 and the algorithm  $\pi$ . Now,

$$\begin{aligned} & \mathbb{P}[\mathcal{A}_1 \cap \mathcal{A}_2] \\ & \leq \mathbb{P}[\pi \text{ outputs different items on } \mathcal{I}, \mathcal{I}'] \\ & \leq \mathbb{P}[\tilde{W}_t(1) \neq \tilde{U}_t(1) \text{ for some } t \in [T]] \\ & \leq \mathbb{P}[\text{At the start of time step } T, \text{ we have } B < 1] \\ &= \mathbb{P}\left[\sum_{t=1}^{T-1} \mathbb{I}\{W_t(1) = 1, G_t = 1\} > C - 1\right] \\ & \leq \mathbb{P}\left[\sum_{t=1}^T \mathbb{I}\{W_t(1) = 1, G_t = 1\} > (1 + \lambda)2\Delta T\right]. \end{aligned}$$

To this end, note that the random variables in  $\{\mathbb{I}\{W_t(1) = 1, G_t = 1\}\}_{t=1}^T$  are i.i.d. with mean

$$\mathbb{E}[\mathbb{I}\{W_t(1) = 1, G_t = 1\}] = \mathbb{E}[\mathbb{I}\{W_t(1) = 1\}] \cdot \mathbb{E}[\mathbb{I}\{G_t = 1\}] = w(1) \cdot \frac{2\Delta}{w(1)} = 2\Delta.$$

By applying Theorem B.3, we have

$$\mathbb{P}[\mathcal{A}_1 \cap \mathcal{A}_2] \leq \mathbb{P}\left[\sum_{t=1}^T \mathbb{I}\{W_t(1) = 1, G_t = 1\} > (1 + \lambda)2\Delta T\right] \leq \exp\left(-\frac{2\lambda^2\Delta T}{3}\right).$$

Finally, we have

$$\mathbb{P}[\mathcal{A}_1] + \mathbb{P}[\mathcal{A}_2] = \mathbb{P}[\mathcal{A}_1 \cup \mathcal{A}_2] + \mathbb{P}[\mathcal{A}_1 \cap \mathcal{A}_2] \leq 1 + \exp\left(-\frac{2\lambda^2\Delta T}{3}\right),$$

so that

$$\min\{\mathbb{P}[\mathcal{A}_1], \mathbb{P}[\mathcal{A}_2]\} \leq \frac{1}{2} \left[1 + \exp\left(-\frac{2\lambda^2\Delta T}{3}\right)\right],$$

completing the proof of the theorem.  $\square$

### C.6. Proof of Theorem 4.3

**Theorem 4.3.** Fix  $L > 1$ ,  $\lambda \in (0, 1)$  and  $\Delta \in (0, 1/4)$ . For the SH algorithm, there is a BAI with adversarial corruption instance with  $T$  time steps, corruption budget  $C = (1 + \lambda)2\Delta T / (L \log_2 L)$ , and optimality gap  $\Delta$ , such that if  $T$  is sufficiently large,

$$\mathbb{P}[\Delta_{1, i_{\text{out}}} > 0] = \mathbb{P}[\Delta_{1, i_{\text{out}}} \geq \Delta] = \mathbb{P}[i_{\text{out}} \neq 1] \geq 1/2.$$

*Proof.* Consider Theorem 4.2's attack strategy, but applied to SH in phase 1.

We claim that there is a BAI instance  $\mathcal{I}$  with  $T$  time steps, gap  $\Delta$  and  $C = (1 + \lambda)2\Delta T / (L \log_2 L)$ , such that

$$\Pr(\Delta_{1, i_{\text{out}}} \geq \Delta) = \Pr\left(\Delta_{1, i_{\text{out}}} \geq \frac{C \cdot L \log_2 L}{2(1 + \lambda)T}\right) \geq 1/2$$

when  $T$  is sufficiently large. This is a matching lower bound for SH in Table 1.

Consider a Bernoulli instance  $\{w(i)\}_{i \in [L]}$  with  $w(1) \in [1/2, 1]$  and  $w(i) = w(1) - \Delta$  for  $i \in [L] \setminus \{1\}$ . In phase 1, SH pulls each  $i \in [L]$  for  $\tau = \lceil T / (L \log_2 L) \rceil$  times, computes the empirical means  $\{\hat{w}_1(i)\}_{i \in [L]}$ , and removes the  $\lceil L/2 \rceil$  items with smallest  $\hat{w}_1(i)$  from consideration.

During phase 1, SH pulls item 1 at fixed time steps  $\{t_s\}_{s=1}^\tau$ . When the adversary determines  $\{c_{t_s}(i)\}_{i \in [L]}$ , *he knows*  $\{W_{t_s}(i)\}_{i \in [L]}$ , *and knows that item 1 will be pulled at time  $t_s$* . The adversary attacks by solely corrupting item 1 solely at times  $\{t_s\}_{s=1}^\tau$ .

If the corruption budget is not exhausted, set

$$\begin{aligned} \Pr(\tilde{W}_{t_s}(1) = 0 | W_{t_s}(1) = 1) &= \frac{2\Delta}{w(1)} = 1 - \Pr(\tilde{W}_{t_s}(1) = 1 | W_{t_s}(1) = 1), \\ \Pr(\tilde{W}_{t_s}(1) = 0 | W_{t_s}(1) = 0) &= 1, \end{aligned}$$

which implies that

$$\begin{aligned} \Pr(\tilde{W}_{t_s}(1) = 1) &= w(1) - 2\Delta, \\ \Pr(c_{t_s}(1) = -1) &= \Pr(\tilde{W}_{t_s}(1) = 0 | W_{t_s}(1) = 1) \Pr(W_{t_s}(1) = 1) = 2\Delta. \end{aligned}$$

If exhausted, no corruption.

Let  $X_1, \dots, X_\tau \sim \text{Bern}(w(1) - 2\Delta)$ ,  $Y_1, \dots, Y_\tau \sim \text{Bern}(2\Delta)$  be i.i.d. random variables and event

$$\mathcal{E} := \{\text{corruption budget not exhausted at end of phase 1}\}.$$

Then

$$\begin{aligned} \Pr\left(\hat{w}_1(i) \leq w(1) - \frac{3\Delta}{2}\right) &\geq \Pr\left(\hat{w}_1(i) \leq w(1) - \frac{3\Delta}{2} \mid \mathcal{E}\right) \cdot \Pr(\mathcal{E}) \\ &= \Pr\left(\frac{1}{\tau} \sum_{s=1}^\tau X_s \leq w(1) - \frac{3\Delta}{2}\right) \cdot \Pr\left(\sum_{s=1}^\tau Y_s \leq \frac{(1 + \lambda)2\Delta T}{L \log_2 L}\right), \end{aligned}$$

which exceeds  $1 - \exp\left[-\frac{T\Delta^2}{2L \log_2 L}\right] - \exp\left[-\frac{2\lambda^2 T\Delta}{3L \log_2 L}\right]$ . Thus, for all  $i \neq 1$ ,

$$\Pr\left(\hat{w}_1(i) > w(1) - \frac{3\Delta}{2}\right) \geq 1 - \exp\left[-\frac{T\Delta^2}{2L \log_2 L}\right].$$

Lastly, by the union bound,

$$\Pr(\text{Item 1 removed after phase 1}) \geq 1 - (L + 1) \exp\left[-\frac{T \max\{1, \lambda^2\} \Delta^2}{2L \log_2 L}\right].$$

We complete the proof by noting that

$$1 - (L + 1) \exp\left[-\frac{T \max\{1, \lambda^2\} \Delta^2}{2L \log_2 L}\right] \geq 1/2$$

for  $T$  large enough.

□



### C.7. Proof of Theorem 4.4

**Theorem 4.4.** Fix any  $\lambda, \epsilon \in (0, 1)$ . If  $C \geq L \cdot \{1 - (1 - \lambda)[1 - w(1)]\} \cdot T$ , Strategy (I)'s attack results in

$$\mathbb{P}[\Delta_{1, i_{\text{out}}} > \epsilon] \geq 1 - \frac{L\epsilon}{L} - \exp \left[ - \frac{\lambda^2 TL[1 - w(1)]}{2} \right].$$

If instead  $C \geq L \cdot [1 - (1 - \lambda)w(L)] \cdot T$ , Strategy (II)'s attack results in

$$\mathbb{P}[\Delta_{1, i_{\text{out}}} > \epsilon] \geq 1 - \frac{L\epsilon}{L} - \exp \left[ - \frac{\lambda^2 TLw(L)}{2} \right].$$

*Proof. Part (a).* Let  $X_1, \dots, X_n$  be Bernoulli random variables taking values in  $\{0, 1\}$  such that  $\mathbb{E}[X_t | X_1, \dots, X_{t-1}] \leq \mu$  for all  $t \leq n$ , and  $Y = X_1 + \dots + X_n$ . Let  $X'_t = 1 - X_t$  for all  $1 \leq t \leq n$ ,  $\mu' = 1 - \mu$ ,  $Y' = X'_1 + \dots + X'_n$ . Then, Theorem B.3 indicates for all  $\delta \in (0, 1)$

$$\begin{aligned} \Pr[Y' \leq (1 - \delta)n\mu'] &\leq \exp \left( - \frac{\delta^2 n\mu'}{2} \right) \Rightarrow \Pr[n - Y \leq (1 - \delta)n(1 - \mu)] \leq \exp \left[ - \frac{\delta^2 n(1 - \mu)}{2} \right] \\ \Rightarrow \Pr[Y \geq n - (1 - \delta)n(1 - \mu)] &\leq \exp \left[ - \frac{\delta^2 n(1 - \mu)}{2} \right]. \end{aligned}$$

(i) For all  $i \in [L]$ ,  $W_t(i)$  denotes the random reward of item  $i$  at time step  $t$ . Fix any  $\lambda \in (0, 1)$ . We can apply the inequality above with  $\mu = w(1)$ ,  $n = TL$  to get

$$\begin{aligned} \mathbb{P} \left[ \sum_{t=1}^T \sum_{i=1}^L W_t(i) \geq TL - (1 - \lambda)TL[1 - w(1)] \right] &\leq \exp \left[ - \frac{\lambda^2 TL[1 - w(1)]}{2} \right] \\ \Rightarrow \mathbb{P} \left[ \sum_{t=1}^T \sum_{i=1}^L \mathbb{I}\{W_t(i) = 1\} \geq TL \cdot \{1 - (1 - \lambda)[1 - w(1)]\} \right] &\leq \exp \left[ - \frac{\lambda^2 TL[1 - w(1)]}{2} \right]. \end{aligned}$$

(ii) Let

$$\mathcal{E}_{\lambda, 0} := \left\{ \sum_{t=1}^T \sum_{i=1}^L \mathbb{I}\{W_t(i) = 1\} < TL \cdot \{1 - (1 - \lambda)[1 - w(1)]\} \right\}.$$

When  $\mathcal{E}_{\lambda, 0}$  holds, throughout the whole horizon ( $T$  time steps), there are less than  $TL \cdot \{1 - (1 - \lambda)[1 - w(1)]\}$  random rewards that equal to 1. If we additionally have

$$C \geq TL \cdot \{1 - (1 - \lambda)[1 - w(1)]\} := C_{\lambda, 0},$$

the adversary can shift the random reward to 0 whenever it equals to 1, which implies that the agent get a corrupted reward equals to 0 at each time step.

Altogether, when  $\mathcal{E}_{\lambda, 0}$  holds and  $C \geq C_{\lambda, 0}$ , the agent get a corrupted reward equals to 0 at each time step. Therefore, the observations of random rewards throughout the whole horizon provides no information about the mean reward  $w(i)$  for any item  $i \in [L]$ . In this case, the best method for the agent to output an item is to randomly output any ground item with a uniform probability of  $1/L$ . As a result, for any item  $i$ ,

$$\mathbb{P}[\{i_{\text{out}} = i\} \cap \mathcal{E}_{\lambda, 0}] \leq \frac{1}{L}.$$

Recall that  $L_\epsilon := |\{i \in [L] : \Delta_{1, i} \leq \epsilon\}|$  counts the items with mean reward at most  $\epsilon$  worse than that of the optimal item, we have

$$\mathbb{P}[\{\Delta_{1, i_{\text{out}}} \leq \epsilon\} \cap \mathcal{E}_{\lambda, 0}] \leq \sum_{i \in [L], \Delta_{1, i} \leq \epsilon} \mathbb{P}[\{i_{\text{out}} = i\} \cap \mathcal{E}_{\lambda, 0}] \leq \frac{L_\epsilon}{L}.$$

(iii) Therefore,

$$\begin{aligned}\mathbb{P}[\Delta_{1,i_{\text{out}}} \leq \epsilon] &= \mathbb{P}[\{\Delta_{1,i_{\text{out}}} \leq \epsilon\} \cap \mathcal{E}_{\lambda,0}] + \mathbb{P}[\{\Delta_{1,i_{\text{out}}} \leq \epsilon\} \cap \overline{\mathcal{E}_{\lambda,0}}] \\ &\leq \mathbb{P}[\{\Delta_{1,i_{\text{out}}} \leq \epsilon\} \cap \mathcal{E}_{\lambda,0}] + \mathbb{P}[\overline{\mathcal{E}_{\lambda,0}}] \leq \frac{L_\epsilon}{L} + \exp\left[-\frac{\lambda^2 TL[1-w(1)]}{2}\right],\end{aligned}$$

Lastly,

$$\mathbb{P}[\Delta_{1,i_{\text{out}}} > \epsilon] \geq 1 - \frac{L_\epsilon}{L} - \exp\left[-\frac{\lambda^2 TL[1-w(1)]}{2}\right].$$

**Part (b).** (i) For all  $i \in [L]$ ,  $W_t(i)$  denotes the random reward of item  $i$  at time step  $t$ . Fix any  $\lambda \in (0, 1)$ . We can apply Theorem B.3 with  $\mu = w(L)$ ,  $n = TL$  to get

$$\mathbb{P}\left[\sum_{t=1}^T \sum_{i=1}^L W_t(i) \leq (1-\lambda)TLw(L)\right] \leq \exp\left[-\frac{\lambda^2 TLw(L)}{2}\right].$$

Meanwhile,

$$\begin{aligned}\left\{\sum_{t=1}^T \sum_{i=1}^L W_t(i) \leq (1-\lambda)TLw(L)\right\} &= \left\{\sum_{t=1}^T \sum_{i=1}^L \mathbb{I}\{W_t(i) = 1\} \leq (1-\lambda)TLw(L)\right\} \\ &= \left\{\sum_{t=1}^T \sum_{i=1}^L \mathbb{I}\{W_t(i) = 0\} \geq TL - (1-\lambda)TLw(L) = TL \cdot [1 - (1-\lambda)w(L)]\right\}.\end{aligned}$$

Therefore,

$$\mathbb{P}\left[\sum_{t=1}^T \sum_{i=1}^L \mathbb{I}\{W_t(i) = 0\} \geq TL \cdot [1 - (1-\lambda)w(L)]\right] \leq \exp\left[-\frac{\lambda^2 TLw(L)}{2}\right].$$

(ii) Let

$$\mathcal{E}_{\lambda,1} := \left\{\sum_{t=1}^T \sum_{i=1}^L \mathbb{I}\{W_t(i) = 0\} < TL \cdot [1 - (1-\lambda)w(L)]\right\}.$$

When  $\mathcal{E}_{\lambda,1}$  holds, throughout the whole horizon ( $T$  time steps), there are less than  $TL \cdot [1 - (1-\lambda)w(L)]$  random rewards that equal to 0. If we additionally have

$$C \geq TL \cdot [1 - (1-\lambda)w(L)] := C_{\lambda,1},$$

the adversary can shift the random reward to 1 whenever it equals to 0, which implies that the agent get a corrupted reward equals to 1 at each time step.

Altogether, when  $\mathcal{E}_{\lambda,1}$  holds and  $C \geq C_{\lambda,1}$ , the agent get a corrupted reward equals to 1 at each time step. Therefore, the observations of random rewards throughout the whole horizon provides no information about the mean reward  $w(i)$  for any item  $i \in [L]$ . In this case, the best method for the agent to output an item is to randomly output any ground item with a uniform probability of  $1/L$ . As a result, for any item  $i$ ,

$$\mathbb{P}[\{i_{\text{out}} = i\} \cap \mathcal{E}_{\lambda,1}] \leq \frac{1}{L}.$$

Recall that  $L_\epsilon := |\{i \in [L] : \Delta_{1,i} \leq \epsilon\}|$  counts the items with mean reward at most  $\epsilon$  worse than that of the optimal item, we have

$$\mathbb{P}[\{\Delta_{1,i_{\text{out}}} \leq \epsilon\} \cap \mathcal{E}_{\lambda,1}] \leq \sum_{i \in [L], \Delta_{1,i} \leq \epsilon} \mathbb{P}[\{i_{\text{out}} = i\} \cap \mathcal{E}_{\lambda,1}] \leq \frac{L_\epsilon}{L}.$$

(iii) Therefore,

$$\begin{aligned}\mathbb{P}[\Delta_{1,i_{\text{out}}} \leq \epsilon] &= \mathbb{P}[\{\Delta_{1,i_{\text{out}}} \leq \epsilon\} \cap \mathcal{E}_{\lambda,1}] + \mathbb{P}[\{\Delta_{1,i_{\text{out}}} \leq \epsilon\} \cap \overline{\mathcal{E}_{\lambda,1}}] \\ &\leq \mathbb{P}[\{\Delta_{1,i_{\text{out}}} \leq \epsilon\} \cap \mathcal{E}_{\lambda,1}] + \mathbb{P}[\overline{\mathcal{E}_{\lambda,1}}] \leq \frac{L\epsilon}{L} + \exp\left[-\frac{\lambda^2 T L w(L)}{2}\right],\end{aligned}$$

Lastly,

$$\mathbb{P}[\Delta_{1,i_{\text{out}}} > \epsilon] \geq 1 - \frac{L\epsilon}{L} - \exp\left[-\frac{\lambda^2 T L w(L)}{2}\right].$$

□

## D. Additional numerical results

### D.1. Details of Figures 3(a) and 3(b)

Table A.1. Comparison of PSS( $u$ ) to Other Algorithms

| $\lambda$ | $w^*$ | $w'$ | PSS(2) | SH | UP |
|-----------|-------|------|--------|----|----|
| 0.5       | 0.4   | 0.2  | 76     | 42 | 12 |
| 0.5       | 0.5   | 0.2  | 91     | 64 | 13 |
| 0.5       | 0.5   | 0.3  | 74     | 51 | 19 |
| 0.9       | 0.4   | 0.2  | 72     | 45 | 9  |
| 0.9       | 0.5   | 0.2  | 83     | 64 | 7  |
| 0.9       | 0.5   | 0.3  | 60     | 40 | 12 |

Here, we provide the raw numbers of for Figures 3(a) and 3(b). We see that PSS(2) consistently and clearly outperform the non-robust BAI algorithms on all instances here.

### D.2. Further observations

To further evaluate the impact of  $T$ ,  $L$ , and  $\lambda$  on the success probabilities of PSS(2), SH and UP, we run each algorithm for 1000 times independently with varying sets of parameters, while keeping the MAB instance at  $w^* = 0.4$  and  $w' = 0.2$  fixed.

Recall that according to Theorem 4.3, we set the CPS

$$\frac{C}{T} = \frac{2\Delta \cdot (1 + \lambda)}{L \log_2 L}. \quad (\text{D.1})$$

This is the scaling of the CPS that ensures that SH fails with high probability as  $T$  grows. Notice that  $C/T$  grows with  $\lambda$  and decreases with  $L$ . We implement the attack strategy as applied in Theorem 4.3 (see Algorithm 2) and vary  $L$  and  $T$ .

In each subplot in Figure A.1, we consider different number of items  $L$  and use different values of  $\lambda$ , resulting in different CPSes. We let  $\lambda$  grows with  $L$ , so the identification of the best arm would pose significant difficulty to SH as prescribed by Eqn. (D.1). The figures show that as  $T$  grows, the success (BAI) probabilities of PSS(2) demonstrate an increasing trend, and in the case of  $L = 32$ ,  $\lambda = 9$  the percentage of successful BAI converges to 100%. In stark contrast, the percentages of successful BAI for SH are always below 20%. In the case of  $L = 32$ ,  $\lambda = 9$ , the percentage appears to converge to 0 as  $T$  increases. This implies that SH fails with high probability when  $T$  is sufficiently large, which corroborates Theorem 4.3. However, the randomization inherent in PSS(2) ensures that it remains extremely robust to the corruption strategy and it successfully identifies the best item a large fraction of times as  $T \rightarrow +\infty$ ; this corroborates our main result—Theorem 4.1.

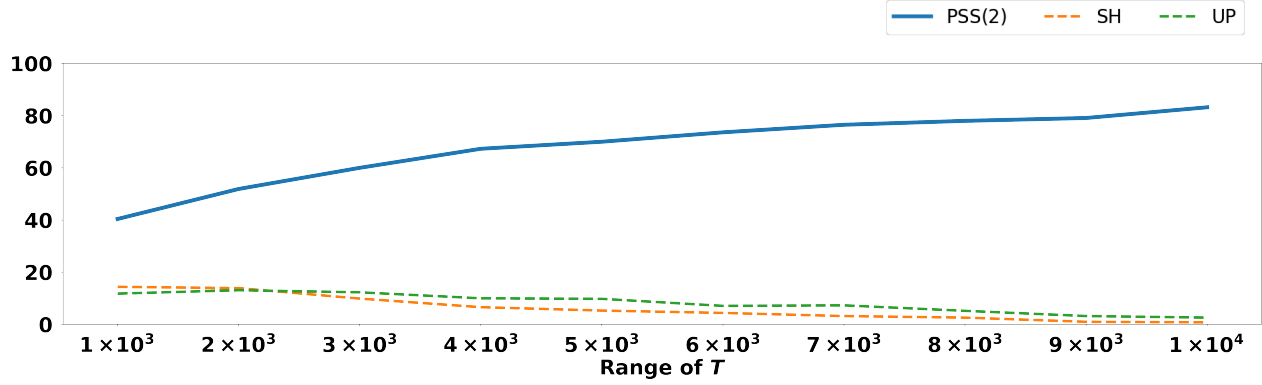

(a)  $L = 32, \lambda = 9$

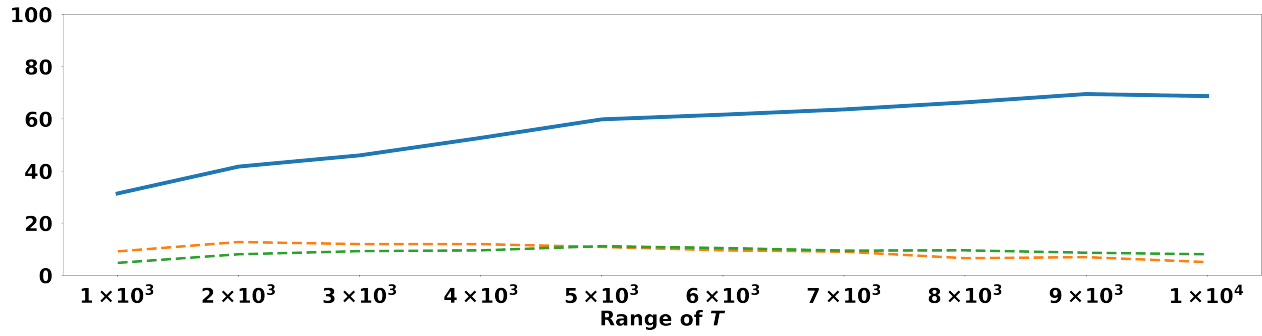

(b)  $L = 64, \lambda = 19$

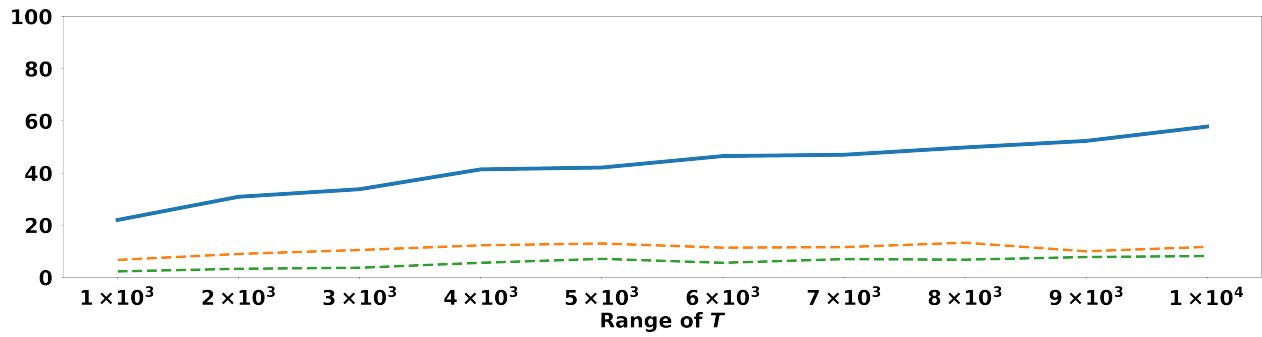

(c)  $L = 128, \lambda = 39$

Figure A.1. Percentage of correct BAI of PSS(2), SH and UP. We fix the instance to be  $w^* = 0.4, w' = 0.2$ .
